# Supplementary material for: Evaluation of Precursor MicroRNA (Pre-miRNA) as A Powerful Tool for Robust CHO Production Cell Line Platform Development
Source: Research Square preprint supplement (doi:10.21203/rs.3.rs-5413112/v1), 2024-11-29
Supplement: Supplementary file 1 [file 966a4d6662285b37b55ec4ec.xlsx]

## Sheet: Sheet1
Supplementary Table S1. The sequences of mature miRNAs, pre-miRNAs, pri-miRNAs, and miRNA sponges
Name	Sequences (5’→3’)
miR-92a	UAUUGCACUUGUCCCGGCCUGU
miR-200a	UAACACUGUCUGGUAACGAUGUU
miR-483	UCACUCCUCCCCUCCCGUCUU
miR-106b	UAAAGUGCUGACAGUGCAGAUA
miR-31	UGCUAUGCCAACAUAUUGCCAUC
miR-2861	GGGGCCCGGCGGCGGGCGG
miR-17	ACUGCAGUGCAGGCACUUGUGG
miR-30c	UGUAAACAUCCUACACUCUCAGC
miR-574	CACGCUCAUGCACACACCCACA
premiR-92a	CUUUCUACACAGGCUGGGAUUUGUUGCAAUGCUGUGUUUCUCGAUGGUAUUGCACUUGUCCCGGCCUGUUGAGUUUGG
premiR-200a	GGGCCUCUGUGGGCAUCUUACCGGACAGUGCUGGAUUUCUUGACUUGACUCUAACACUGUCUGGUAACGAUGUUCAAAGGUGACCC
premiR-483	GAGAAGGAAGACGGGAGAAGAGAAGGGAGUGGUUUUUGGGUGCCUCACUCCUCCCCUCCCGUCUUGUUCUCUC
premiR-106b	CUGCUGGGGCUAAAGUGCUGACAGUGCAGAUAGUGGUCCUCUCUGUGCUACCGCACUGUGGGUACUUGCUGCUCCAGCAGG
premiR-31	CCUGGAGAGGAGGCAAGAUGCUGGCAUAGCUGUUGAACUAGAACCUGCUAUGCCAACAUAUUGCCAUCUUUCCUGUC
premiR-2861	CUCCUCUGCAGCUCCGGCUCCCCCUGGCCUCCCGGGAACUACAAGUCCCAGGGGGCCCGGCGGCGGGCGGAGACCGGAAGAG
premiR-17	AGGAUAAUGUCAAAGUGCUUACAGUGCAGGUAGUGAUAUGCACAUCUACUGCAGUGCAGGCACUUGUGGCAUUAUGGU
premiR-30c	UGACAGAUACUGUAAACAUCCUACACUCUCAGCUGUGAAAAGUAAGAAAGCUGGGAGAAGGCUGUUUACUCUCUCUGCC
premiR-574	UGUGCGGGCGUGUGAGUGUGUGUGUGUGAGUGUGUGUCGCUCCGUGUCCACGCUCAUGCACACACCCACACGCCCGCACGCCGG
primiR-92a	UAGUGCAGGUAGUGUCCACUCAUCUACUGCAUUACGAGCACUUCCAGUGCUGCCAGCUGGAGAGCCCCAGCCUCGCUCGCCCGCUUGCCCGCUCGCCCUUCACCCACUCAAACGGUCCUGGUACUGAGCACUGGUCUAUGGUUAGUUUUGCAGGUUUGCAUCCAGCUGUAUAAUACUCUGCUGUGCAAAUCCAUGCAAAACUGACUGUGGUGGUGAAAAGUCUGUAGAACAGUGAGGGAAAAUCAAACCCCUUUCUACACAGGCUGGGAUUUGUUGCAAUGCUGUGUUUCUCGAUGGUAUUGCACUUGUCCCGGCCUGUUGAGUUUGGUGGGGAUUGUGACCAGAAGAUGUGAAAAUUAAAUAUUGCUGAAGAUGCCAUGCCGAUUUCCAUUGUAAAAA…
primiR-200a	GUUAAUUUCCGCCUAGGAUGCCUUCCCUUCCUGCGUCAAGUGGGUACUGACUGACCUGCAGACUAACAGCAUCUCUAACAUGGGUAUUGAGCCAAUGUGCCACAGUUCCUUGCUUUGGACAAAGCAGAAAGUAUGUAUGAGUCAGAGUCAUCCUCUCUCUGCCAGCCUACCUGUUCAUGGCACCUGGUUUCCACUGGGCCAUAUGGAAACCCACAUAUCUUACCCUGUAUCUUCCUACCAAAGCUCAUCUGGGCCUCUGUGGGCAUCUUACCGGACAGUGCUGGAUUUCUUGACUUGACUCUAACACUGUCUGGUAACGAUGUUCAAAGGUGACCCACCACUCGCCGAAGACAGGCUGAUGAUGCACUUGUCCUAGCUCCUGGACUACAAAUAGACCAA…
primiR-483	CUUCAAACCUCUGGAAACCACUCCUGCUCCUGAUCACUCUGAAGCCCCCACCACCCGCCUUCUCUGCACCCUCUGGCUCUGCGGGACCAGCCCUUGUUCCAGGAGUCACUCCUGCACAGAGGGGGCUUCCAGAAUAGGAGGGUCCAAGGUGGAGCCUUCAGUGGCUCUACCCCCCAACCCAGCCACAGACCUGAGUGUGUGGGGGAGAGAAGGAAGACGGGAGAAGAGAAGGGAGUUGGUUUUGGGUGCCUCACUCCUCCCCUCCCGUCUUGUUCUCUCCUACCCUAUCUUCCCUGUCUCAGCUCAGUGCUGGGGGUUGGGGGUGGGCCCCUCAGGCUCAAGGUGGCACCAGGCCAGGGCCCCAAGUCCAGGGACCACACCUGUGUCCACCAUGGCCCC…
primiR-106b	AUGUGCCGAGAGAGGCAGCCUACCGUGCCUGAAUCUCUGGCUGACUACAUCACAGCAGCAUAUGUAGAGAUGAGGCGAGAGGCCCGGGCCAGUAAGGAUGCCACCUAUACUUCUGCCCGGACCCUACUGGCCAUUCUUCGACUUUCUACUGCUCUGGUGAGUGCUGUGUCCUGUCAGCUGGAAGGCUGACCCUUGCCUGCCACCUCACCUUAAUGGCCCUCAGGCUGCCUCUUCCUCCCUCCCACUAGCCCUGCUGGGGCUAAAGUGCUGACAGUGCAGAUAGUGGUCCUCUCUGUGCUACCGCACUGUGGGUACUUGCUGCUCCAGCAGGGCACAUACAACACCCAUGGAGGGAAAGGCUGCUUGCUACUUAAAUCCAAGAGGGGCAGAUGGACUUGU…
primiR-31	GAGGCUGACAAAGUACCUGGCUCCAGGACAAGACUGUAAGGGGCUUGUGCAAUAGAUCCUUCAUAACCUCCUAGCUGACCAAGGGAAACACACACCAUGGACUUCACAUGGCUCACUGAAUGACUGUGUGAAAUGCUCAACAUUUGUUUCUAGAAAACAAGGCUGAUGUUAGCAGUGUCCAAGUGAGUAAAAUGUUUCAUCUCUGUAGAUCUAGUUCACAAUCAUUUAUUGCUUGUAAAUAAUAUCUUAACAGAAACCCAUGAAAGCAGAAAACAAAAGUAAUUUAUAAUUCUAAUUAUUGCAAAAUAAUAAAUCACUAUUUAAAAUAAUCACCUACUCUUCAAGAAAAAUGUUUUAAGAAUGUUCUCCAAUAUAUAUGUAUGUAUACAUUUUACACAG…
primiR-17	UGUGUGGAUUUGGGAAAGAGCCCACAUUCUAAUAGGGAUUGCUUAUAACUUUGAAGAAUGCUAUUCUUAAGGCUUAAAUCUGUACAGUUCUGAACUUGUUGCUUUUAGAUCCUUUUCUCCCGUUGGGUGUAAGCUGAAAUUUGUGUUUGUCACAGGUGCUAGGGCUUUGGGCUGCUGUUCUAAUUAUUUAUUUCAAAUUUAGCAGGAAUGCAGAGCGCGUCACCUUGUGAGACUGGAGACUGAUGGAGUCAGGAUAAUGUCAAAGUGCUUACAGUGCAGGUAGUGAUAUGCACAUCUACUGCAGUGCAGGCACUUGUGGCAUUAUGGUGACAGCCGCCUCGCUCGGGAGCCACGGUGGGCGCGGAGUGACAGCGAGGGCCGCCUGCUGGUGCUGAGUGC…
primiR-574	ACUCGGCGGCCAAGCGGUAAGAGGUGCGGGCGUGUGAGUGUGUGUGUGUGAGUGUGUGUCGCUCCGUGUCCACGCUCAUGCACACACCCACACGCCCGCACGCCGGGUCUGCACCCUCGACCCGCCUGGAGCUCUGCGGAGCCGGCUGCCAGAGUCUUGGCACAGCCAGUUUGAAAAGUUUCCCUAAGCGUCCCAAGUCAGAUCCUCCCAGGGCGAAGCACUGAGGGAUUCAGUCCCUGCCAGGCAAAGGCCUCCAUCCCUAGAGUGUGCCUGCCCUAGCCCU
premiR-183	UGUUCUGUGUAUGGCACUGGUAGAAUUCACUGUGAACAGUCUCAGUCAGUGAAUUACCGAAGGGCCAUAAACAGAGCAGA
premiR-342	CUCAAGGUGAGGGGUGCUAUCUGUGAUUGAGGGGCAUGGUCAAUGGAAUUGUCUCACACAGAAAUCGCACCCGUCACCUUGGCCU
premiR-3074	GGGCUGGACUCCUGUUCCUGCUGAACUGAGCCAGUGCACUGGAAUCAACUGUUUCAGCUCAGUAGGCACAGGAGGCGGAGCCC
premiR-1839	CUAAAUGAAAAGGUAGAUAGAACAGGUCUUGUUUGCAAAAUAAAUCCAAGACCUACUUAUCUACCAACAGCCAUUACCUA
premiR-143	CUGUCUCCCAGCCUGAGGUGCAGUGCUGCAUCUCUGGUCAGUUGGGAGUCUGAGAUGAAGCACUGUAGCUCAGGAAGGGA
premiR-136	GAGGACUCCAUUUGUUUUGAUGAUGGAUUCUUAAGCUCCAUCAUCGUCUCAAAUGAGUCUUC
premiR-19b	GUCUAUGGUUAGUUUUGCAGGUUUGCAUCCAGCUGUAUAAUACUCUGCUGUGCAAAUCCAUGCAAAACUGACUGUGGUGG
premiR-130b	CUUGCUGGACACUCUUUCCCUGUUGCACUACUGUGGGCCACUGGGGAGCAGUGCAAUGAUGAAAGGGCAUCUGUCAGGC
premiR-30e	CUUUGCUACUGUAAACAUCCUUGACUGGAAGCUGUAAGGUGUUGAGAAGAGCUUUCAGUCGGAUGUUUACAGCGGCAGGCUGC
premiR-20a	UCUGUGGCACUAAAGUGCUUAUAGUGCAGGUAGUGUCCACUCAUCUACUGCAUUACGAGCACUUCCAGUGCUGCCAGCUG
premiR-491	AAUUGACUUAGCUGGGAAGUGGGGAACCCUUCCAUGAGGAGUAGAACACUCCUUAUGCAAGAUUCCCUUCUACCUGACUGAGUUGA
premiR-557	AGAAUGGGCAAAUGAACAGUAAAUUUGGAGGCCUGGGGCCCUCCCUGCUGCUGGAGAAGUGUUUGCACGGGUGGGCCUUGUCUUUGAAAGGAGGUGGA
premiR-374b	GAAGAAAUCCUACUCGGGUGGAUAUAAUACAACCUGCUAAGUGUUCUAGCACUUAGCAGGUUGUAUUAUCAUUGUCCGAGGUUAUGGCUCUCGUC
premiR-425	GUGCUUUGGAAUGACACGAUCACUCCCGUUGAGUGGGCACCCAAGAAGCCAUCGGGAAUGUCGUGUCCGCCCAGUGCUCU
premiR-711	CAUGUUCCUAACUUUGAAUCUCUUCUUAGGGUGCUUCAGGCAAAGCUGGGGACCCGGGGAGAGAUGUAAGUCUGGGGAGAUG
premiR-484	UGCAGCCUCGUCAGGCUCAGUCCCCUCCCGAUAAACCUCUAAAUAGGGUGUUUCCCCGGGGGUGGCCUCCG
premiR-138	GGUUGCUGCAGCUGGUGUUGUGAAUCAGGCCGACGAGCAGCGCAUCCUCUUACCCGGCUAUUUCACGACACCAGGGUUGC
premiR-1287	GUUGUGCUGUCCAGGUGCUGGAUCAGUGGUUCGAGUCUGAGCCUUUAAAAGCCACUCUAGCCACAGAUGCAGUGAUUGGAGCCAUGACAA
5’ flanking	AGGTAGTGAGTCGACCAGTGGATCCTGGAGGCTTGCTGAAGGCTGTATGCTGAAATGTACTG
3’ flanking	GTACATTTCAGGACACAAGGCCTGTTACTAGCACTCACATGGAACAAATGGCCCAGATCTGGC
