# Supplementary material for: Evaluation of Precursor MicroRNA (Pre-miRNA) as A Powerful Tool for Robust CHO Production Cell Line Platform Development
Source: Research Square preprint supplement (doi:10.21203/rs.3.rs-5413112/v1), 2024-11-29
Supplement: Supplementary file 2 [file f17f7391631be5941290062c.xlsx]

## Sheet: Sheet1
Supplementary Table S2. Primers for ddPCR annalysis
Primer name	Sequences
miR-92a-F	CCGATTGCACTTGTCCC
miR-200a-F	AAAGCACTCCTCCCCTC
miR-483-F	GGCGAACACTGTCTGGTA
U6-F	CTCGCTTCGGCAGCACA
U6-R	AACGCTTCACGAATTTGCGT
mAb-HC-F	ACCAAGAACCAGGTCAGCCT
mAb-HC-R	TGTAGAGGAAGAAGGAGCCG
mAb-LC-F	CAGTGGAAGGTGGATAACG
mAb-LC-R	GCAGGCGTAGACTTTGTGT
GAPDH-F	GCCAAGAGGGTCATCATCTC
GAPDH-R	CCTTCCACAATCCCAAAGTT
